# Supplementary material for: Variation in Plant–Pollinator Network Structure along the Elevational Gradient of the San Francisco Peaks, Arizona
Source: MDPI journal article supplement (doi:10.3390/insects12121060), 2021-11-26
Supplement: s1 [file s1]

Supplemental Material 1: Locality of 18 Site Locations across the gradient

| <b>Elevation</b> | <b>Site</b> | <b>Latitude</b> | <b>Longitude</b> |
|------------------|-------------|-----------------|------------------|
| Ponderosa pine   | 2           | 35.4163         | -111.6714        |
| Ponderosa pine   | 4           | 35.4270         | -111.6963        |
| Ponderosa pine   | 5           | 35.3539         | -111.7306        |
| Ponderosa pine   | 6           | 35.3889         | -111.7251        |
| Ponderosa pine   | 7           | 35.3539         | -111.7233        |
| Ponderosa pine   | 8           | 35.3879         | -111.6869        |
| Mixed conifer    | 1           | 35.3285         | -111.7380        |
| Mixed conifer    | 2           | 35.3539         | -111.7306        |
| Mixed conifer    | 3           | 35.3290         | -111.7390        |
| Mixed conifer    | 4           | 35.3543         | -111.7320        |
| Mixed conifer    | 5           | 35.3803         | -111.6858        |
| Mixed conifer    | 6           | 35.3757         | -111.7321        |
| Spruce Fir       | 1           | 35.3585         | -111.7080        |
| Spruce Fir       | 2           | 35.3387         | -111.6511        |
| Spruce Fir       | 3           | 35.3322         | -111.6561        |
| Spruce Fir       | 4           | 35.3602         | -111.7189        |
| Spruce Fir       | 5           | 35.3589         | -111.7181        |
| Spruce Fir       | 6           | 35.3568         | -111.7173        |
